# Supplementary material
Source: PubMed Central journal article supplement (PMC9107461)
Supplement: 41419_2022_4861_MOESM13_ESM.pdf [file 41419_2022_4861_MOESM13_ESM.pdf]

## **CDDIS-22-0072RR Initial Quality Check**

It has come to our attention that your most recent author list differs from the one in your original submission. Please request agreement from all authors including additions and deletions, these can be collected in the following way:

Email your co-authors with the change, and ask them to reply to your email confirming that they agree to these changes. Once you have collected these replies, please combine all of the co-authors' email responses in one document and upload this file to your submission.

Thank you for your email about our manuscript entitled "Sex differences in global metabolomic profiles of COVID-19 patients" (**CDDIS-22-0072RR**). All confirmatory emails are below.

Thank you.

Kind regards,  
Andrey

Andrey S. Tsvetkov, Ph.D.  
Assistant Professor  
Department of Neurology  
The University of Texas McGovern Medical School at Houston  
6431 Fannin St., MSB 4.142  
Houston, Texas 77030

<https://med.uth.edu/neurology/specialty-programs/brains-research-laboratory/dr-andrey-tsvetkovs-lab/>

Admin Assistant: Nur Compan ([Nur.R.CompanZubieta@uth.tmc.edu](mailto:Nur.R.CompanZubieta@uth.tmc.edu); 713-500-7545)

**From:** [Diaz Escarcega, Rocio](#)  
**To:** [Tsvetkov, Andrey](#)  
**Subject:** Re: our COVID-19 manuscript  
**Date:** Tuesday, April 12, 2022 10:42:33 AM

---

Hi Andrey,

Yes, I agree.

Best,  
Rocio

---

**From:** Tsvetkov, Andrey <Andrey.S.Tsvetkov@uth.tmc.edu>  
**Sent:** Tuesday, April 12, 2022 10:26 AM  
**To:** Diaz Escarcega, Rocio <Rocio.DiazEscarcega@uth.tmc.edu>  
**Subject:** our COVID-19 manuscript

Hi Rocio,

In checking in our manuscript submitted to Cell Death & Disease (CDDIS-22-0072RR; Sex differences in global metabolomic profiles of COVID-19 patients), it has come to their attention that the following must be addressed before we can proceed. I should email all co-authors with the addition of **Guadalupe J. Ortiz**, and ask them to reply to my email confirming that they agree to the addition. Once I have collected these replies, I should then combine all of the co-authors' email responses in one document and upload this file to our submission. Please let me know if you are OK with adding Guadalupe J. Ortiz to our manuscript co-authors.

Thank you.  
Andrey

**From:** [Honarpisheh, Pedram](#)  
**To:** [Tsvetkov, Andrey](#)  
**Subject:** Re: our COVID-19 manuscript  
**Date:** Tuesday, April 12, 2022 1:04:38 PM

---

I agree with the addition of **Guadalupe J. Ortiz** as a co-author.

Thanks,  
Pedram

---

**From:** Tsvetkov, Andrey <Andrey.S.Tsvetkov@uth.tmc.edu>  
**Sent:** Tuesday, April 12, 2022 10:26 AM  
**To:** Honarpisheh, Pedram <Pedram.Honarpisheh@uth.tmc.edu>  
**Subject:** our COVID-19 manuscript

Hi Pedram,

In checking in our manuscript submitted to Cell Death & Disease (CDDIS-22-0072RR; Sex differences in global metabolomic profiles of COVID-19 patients), it has come to their attention that the following must be addressed before we can proceed. I should email all co-authors with the addition of **Guadalupe J. Ortiz**, and ask them to reply to my email confirming that they agree to the addition. Once I have collected these replies, I should then combine all of the co-authors' email responses in one document and upload this file to our submission. Please let me know if you are OK with adding Guadalupe J. Ortiz to our manuscript co-authors.

Thank you.  
Andrey

## Tsvetkov, Andrey

---

**From:** Delevati Colpo, Gabriela  
**Sent:** Tuesday, April 12, 2022 10:48 AM  
**To:** Tsvetkov, Andrey  
**Subject:** RE: our COVID-19 manuscript

Hi Andrey,

I am ok with adding Javier!  
Thanks for asking!

Thank you,  
Gabi

---

**From:** Tsvetkov, Andrey  
**Sent:** Tuesday, April 12, 2022 10:28 AM  
**To:** Delevati Colpo, Gabriela <Gabriela.D.Colpo@uth.tmc.edu>  
**Subject:** our COVID-19 manuscript

Hi Gabi,

In checking in our manuscript submitted to Cell Death & Disease (CDDIS-22-0072RR; Sex differences in global metabolomic profiles of COVID-19 patients), it has come to their attention that the following must be addressed before we can proceed. I should email all co-authors with the addition of **Guadalupe J. Ortiz**, and ask them to reply to my email confirming that they agree to the addition. Once I have collected these replies, I should then combine all of the co-authors' email responses in one document and upload this file to our submission. Please let me know if you are OK with adding Guadalupe J. Ortiz to our manuscript co-authors.

Thank you.  
Andrey

**From:** [Ahnstedt, Hilda W](#)  
**To:** [Tsvetkov, Andrey](#)  
**Subject:** Re: our COVID-19 manuscript  
**Date:** Tuesday, April 12, 2022 10:32:30 AM

---

Yes, please add Guadalupe J. Ortiz to the manuscript.

Hilda

**Hilda Ahnstedt, PhD**

Senior Program Manager

**UTHealth Houston** | The University of Texas Health Science Center at Houston  
McGovern Medical School

Neurology | Grants and Contracts | The Biorepository of Neurological Disorders  
6431 Fannin St | MSB 7.100 | Houston, TX 77030  
713-500-7742 Phone | 802-488-4616 Cell

---

**From:** Tsvetkov, Andrey <Andrey.S.Tsvetkov@uth.tmc.edu>  
**Sent:** Tuesday, April 12, 2022 10:28  
**To:** Ahnstedt, Hilda W <Hilda.W.Ahnstedt@uth.tmc.edu>  
**Subject:** our COVID-19 manuscript

Hi Hilda,

In checking in our manuscript submitted to Cell Death & Disease (CDDIS-22-0072RR; Sex differences in global metabolomic profiles of COVID-19 patients), it has come to their attention that the following must be addressed before we can proceed. I should email all co-authors with the addition of **Guadalupe J. Ortiz**, and ask them to reply to my email confirming that they agree to the addition. Once I have collected these replies, I should then combine all of the co-authors' email responses in one document and upload this file to our submission. Please let me know if you are OK with adding Guadalupe J. Ortiz to our manuscript co-authors.

Thank you.  
Andrey

**From:** [Couture, Lucy](#)  
**To:** [Tsvetkov, Andrey](#)  
**Subject:** Re: our COVID-19 manuscript  
**Date:** Tuesday, April 12, 2022 10:37:21 AM

---

I am OK with the addition.

Get [Outlook for iOS](#)

---

**From:** Tsvetkov, Andrey <Andrey.S.Tsvetkov@uth.tmc.edu>  
**Sent:** Tuesday, April 12, 2022 10:28:39 AM  
**To:** Couture, Lucy <Lucy.Couture@uth.tmc.edu>  
**Subject:** FW: our COVID-19 manuscript

Hi Lucy,

In checking in our manuscript submitted to Cell Death & Disease (CDDIS-22-0072RR; Sex differences in global metabolomic profiles of COVID-19 patients), it has come to their attention that the following must be addressed before we can proceed. I should email all co-authors with the addition of **Guadalupe J. Ortiz**, and ask them to reply to my email confirming that they agree to the addition. Once I have collected these replies, I should then combine all of the co-authors' email responses in one document and upload this file to our submission. Please let me know if you are OK with adding Guadalupe J. Ortiz to our manuscript co-authors.

Thank you.  
Andrey

**From:** [S Juneja](#)  
**To:** [Tsvetkov, Andrey](#)  
**Subject:** Re: our COVID-19 manuscript  
**Date:** Tuesday, April 12, 2022 6:51:09 PM

---

\*\*\*\* **EXTERNAL EMAIL** \*\*\*\*

Good afternoon,

Yes, I am okay with the addition!

Best,  
Shivanki Juneja

On Tue, Apr 12, 2022 at 10:29 AM Tsvetkov, Andrey <[Andrey.S.Tsvetkov@uth.tmc.edu](mailto:Andrey.S.Tsvetkov@uth.tmc.edu)> wrote:

Hi Shivanki,

In checking in our manuscript submitted to Cell Death & Disease (CDDIS-22-0072RR; Sex differences in global metabolomic profiles of COVID-19 patients), it has come to their attention that the following must be addressed before we can proceed. I should email all co-authors with the addition of **Guadalupe J. Ortiz**, and ask them to reply to my email confirming that they agree to the addition. Once I have collected these replies, I should then combine all of the co-authors' email responses in one document and upload this file to our submission. Please let me know if you are OK with adding Guadalupe J. Ortiz to our manuscript co-authors.

Thank you.

Andrey

--

Shivanki Juneja  
University of Pennsylvania '20  
B.A. in Neuroscience

**From:** [Ortiz IV, Guadalupe J](#)  
**To:** [Tsvetkov, Andrey](#)  
**Subject:** RE: our COVID-19 manuscript  
**Date:** Wednesday, April 13, 2022 11:17:24 AM

---

Hi Andrey,

I accept to be added as a co-author to the manuscript titled: “Sex differences in global metabolomic profiles of COVID-19 patients”. Please let me know if you need any further information from my end.

With respect,

Javier Ortiz

Javier Ortiz IV, PhD  
Research Coordinator II  
**UTHealth** | The University of Texas Health Science Center at Houston  
Neurocognitive Disorders Center  
Department of Neurology  
1941 East Road, Suite 4358  
Houston, TX 77054  
Phone: 713-486-0505  
Email: [Guadalupe.J.Ortiz@uth.tmc.edu](mailto:Guadalupe.J.Ortiz@uth.tmc.edu)

---

**From:** Tsvetkov, Andrey  
**Sent:** Wednesday, April 13, 2022 10:01 AM  
**To:** Ortiz IV, Guadalupe J <[Guadalupe.J.Ortiz@uth.tmc.edu](mailto:Guadalupe.J.Ortiz@uth.tmc.edu)>  
**Subject:** our COVID-19 manuscript

Hi Javier,

Your OK is also needed.

In checking in our manuscript submitted to Cell Death & Disease (CDDIS-22-0072RR; Sex differences in global metabolomic profiles of COVID-19 patients), it has come to their attention that the following must be addressed before we can proceed. I should email all co-authors with the addition of you, **Guadalupe J. Ortiz**, and ask all to reply to my email confirming that they agree to the addition. Once I have collected these replies, I should then combine all of the co-authors’ email responses in one document and upload this file to our submission. Please let me know if you are OK with adding Guadalupe J. Ortiz to our manuscript co-authors.

Thank you.  
Andrey



**From:** [Torres, Glenda L](#)  
**To:** [Tsvetkov, Andrey](#)  
**Subject:** RE: our COVID-19 manuscript  
**Date:** Tuesday, April 12, 2022 10:50:21 AM  
**Attachments:** [image002.png](#)

---

Good morning,  
I accept the addition of Guadalupe Ortiz as an author to the manuscript.

**Warm Regards,**

Glenda Libby Torres, MS

Program Manager-Research

Neurocritical Care

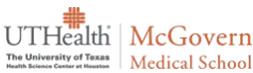

The Vivian L. Smith Department of Neurosurgery  
6431 Fannin St. | MSB 7.154 | Houston, TX 77030  
713.500.5638 tel | 713.500.0665 fax |

---

**From:** Tsvetkov, Andrey <Andrey.S.Tsvetkov@uth.tmc.edu>  
**Sent:** Tuesday, April 12, 2022 10:46 AM  
**To:** Torres, Glenda L <Glenda.L.Torres@uth.tmc.edu>  
**Subject:** our COVID-19 manuscript

Hi Glenda,

In checking in our manuscript submitted to Cell Death & Disease (CDDIS-22-0072RR; Sex differences in global metabolomic profiles of COVID-19 patients), it has come to their attention that the following must be addressed before we can proceed. I should email all co-authors with the addition of **Guadalupe J. Ortiz**, and ask them to reply to my email confirming that they agree to the addition. Once I have collected these replies, I should then combine all of the co-authors' email responses in one document and upload this file to our submission. Please let me know if you are OK with adding Guadalupe J. Ortiz to our manuscript co-authors.

Thank you.  
Andrey

**From:** [James Sollome](#)  
**To:** [Tsvetkov, Andrey](#)  
**Subject:** RE: our COVID-19 manuscript  
**Date:** Tuesday, April 12, 2022 11:13:33 AM  
**Attachments:** [image002.png](#)  
[image003.png](#)  
[image004.png](#)

---

\*\*\*\* **EXTERNAL EMAIL** \*\*\*\*

Hi Andrey,

Yes, I am okay with the addition of Guadalupe J. Ortiz as a co-author.

Kind Regards,  
James

**James Sollome, Ph.D.**  
Study Director, Discovery & Translational Sciences  
Metabolon, Inc.

P: 919.592.7714  
[jsollome@metabolon.com](mailto:jsollome@metabolon.com)  
617 Davis Drive, Suite 100, Morrisville, NC 27560  
P.O. Box 110407, Research Triangle Park, NC 27709  
[www.metabolon.com](http://www.metabolon.com)

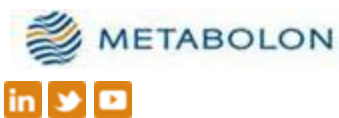

---

**From:** Tsvetkov, Andrey <[Andrey.S.Tsvetkov@uth.tmc.edu](mailto:Andrey.S.Tsvetkov@uth.tmc.edu)>  
**Sent:** Tuesday, April 12, 2022 11:32 AM  
**To:** James Sollome <[jsollome@metabolon.com](mailto:jsollome@metabolon.com)>  
**Subject:** our COVID-19 manuscript

CAUTION: This email originated from outside of Metabolon. Do not click links or open attachments unless you recognize the sender and know the content is safe.

Hi James,

In checking in our manuscript submitted to Cell Death & Disease (CDDIS-22-0072RR; Sex differences in global metabolomic profiles of COVID-19 patients), it has come to their attention that the following must be addressed before we can proceed. I should email all co-authors with the addition of **Guadalupe J. Ortiz**, and ask them to reply to my email confirming that they agree to the addition. Once I have collected these replies, I should then combine all of the co-authors' email responses in one document and upload this file to our submission. Please let me know if you are OK with adding Guadalupe J. Ortiz to our manuscript co-authors.

Thank you.

**From:** [Natalie Tabor](#)  
**To:** [Tsvetkov, Andrey](#)  
**Subject:** Re: FW: our COVID-19 manuscript  
**Date:** Wednesday, April 13, 2022 8:52:25 AM

---

\*\*\*\* **EXTERNAL EMAIL** \*\*\*\*

Yes, I am okay with that.

Congrats on finishing it.

Best,

Natalie

On Tue, Apr 12, 2022 at 10:38 AM Tsvetkov, Andrey <[Andrey.S.Tsvetkov@uth.tmc.edu](mailto:Andrey.S.Tsvetkov@uth.tmc.edu)> wrote:

Hi Natalie,

In checking in our manuscript submitted to Cell Death & Disease (CDDIS-22-0072RR; Sex differences in global metabolomic profiles of COVID-19 patients), it has come to their attention that the following must be addressed before we can proceed. I should email all co-authors with the addition of **Guadalupe J. Ortiz**, and ask them to reply to my email confirming that they agree to the addition. Once I have collected these replies, I should then combine all of the co-authors' email responses in one document and upload this file to our submission. Please let me know if you are OK with adding Guadalupe J. Ortiz to our manuscript co-authors.

Thank you.

Andrey

--

**Natalie Tabor**  
Virginia Tech | Class of 2020 | Magna Cum Laude  
B.S Human Nutrition, Foods, and Exercise  
443-253-0442

Andrey

**DISCLAIMER:** This email and any file transmitted with it are confidential and intended solely for the use of the individual or entity to whom they are addressed. If you are not the named addressee, you should not disseminate, distribute or copy this e-mail. Please notify the sender or the system manager and delete or destroy this email and any attachment immediately.

**From:** [Ganesh, Bhanu P](#)  
**To:** [Tsvetkov, Andrey](#)  
**Subject:** RE: our COVID-19 manuscript  
**Date:** Tuesday, April 12, 2022 11:06:53 AM

---

OK!

---

**From:** Tsvetkov, Andrey  
**Sent:** Tuesday, April 12, 2022 10:34 AM  
**To:** Ganesh, Bhanu P <Bhanu.P.Ganesh@uth.tmc.edu>  
**Subject:** our COVID-19 manuscript

Hi Dr. Ganesh,

In checking in our manuscript submitted to Cell Death & Disease (CDDIS-22-0072RR; Sex differences in global metabolomic profiles of COVID-19 patients), it has come to their attention that the following must be addressed before we can proceed. I should email all co-authors with the addition of **Guadalupe J. Ortiz**, and ask them to reply to my email confirming that they agree to the addition. Once I have collected these replies, I should then combine all of the co-authors' email responses in one document and upload this file to our submission. Please let me know if you are OK with adding Guadalupe J. Ortiz to our manuscript co-authors.

Thank you.  
Andrey

**From:** [Choi, HuiMahn A](#)  
**To:** [Tsvetkov, Andrey](#)  
**Subject:** Re: our COVID-19 manuscript  
**Date:** Tuesday, April 12, 2022 10:41:33 AM

---

Ok with the addition. Thanks

On Apr 12, 2022, at 10:34 AM, Tsvetkov, Andrey  
<Andrey.S.Tsvetkov@uth.tmc.edu> wrote:

Hi Dr. Choi,

In checking in our manuscript submitted to Cell Death & Disease (CDDIS-22-0072RR; Sex differences in global metabolomic profiles of COVID-19 patients), it has come to their attention that the following must be addressed before we can proceed. I should email all co-authors with the addition of **Guadalupe J. Ortiz**, and ask them to reply to my email confirming that they agree to the addition. Once I have collected these replies, I should then combine all of the co-authors' email responses in one document and upload this file to our submission. Please let me know if you are OK with adding Guadalupe J. Ortiz to our manuscript co-authors.

Thank you.  
Andrey

**From:** [Liu, Fudong](#)  
**To:** [Tsvetkov, Andrey](#)  
**Subject:** RE: our COVID-19 manuscript  
**Date:** Tuesday, April 12, 2022 10:41:00 AM

---

Sure no problem! Thanks.

---

**From:** Tsvetkov, Andrey  
**Sent:** Tuesday, April 12, 2022 10:35 AM  
**To:** Liu, Fudong <Fudong.Liu@uth.tmc.edu>  
**Subject:** FW: our COVID-19 manuscript

Hi Fudong,

In checking in our manuscript submitted to Cell Death & Disease (CDDIS-22-0072RR; Sex differences in global metabolomic profiles of COVID-19 patients), it has come to their attention that the following must be addressed before we can proceed. I should email all co-authors with the addition of **Guadalupe J. Ortiz**, and ask them to reply to my email confirming that they agree to the addition. Once I have collected these replies, I should then combine all of the co-authors' email responses in one document and upload this file to our submission. Please let me know if you are OK with adding Guadalupe J. Ortiz to our manuscript co-authors.

Thank you.  
Andrey

**From:** [McCullough, Louise D](#)  
**To:** [Tsvetkov, Andrey](#)  
**Subject:** Re: our COVID-19 manuscript  
**Date:** Tuesday, April 12, 2022 8:17:09 PM

---

You bet!

Sent from my iPhone

On Apr 12, 2022, at 10:35 AM, Tsvetkov, Andrey  
<[Andrey.S.Tsvetkov@uth.tmc.edu](mailto:Andrey.S.Tsvetkov@uth.tmc.edu)> wrote:

Hi Louise,

In checking in our manuscript submitted to Cell Death & Disease (CDDIS-22-0072RR; Sex differences in global metabolomic profiles of COVID-19 patients), it has come to their attention that the following must be addressed before we can proceed. I should email all co-authors with the addition of **Guadalupe J. Ortiz**, and ask them to reply to my email confirming that they agree to the addition. Once I have collected these replies, I should then combine all of the co-authors' email responses in one document and upload this file to our submission. Please let me know if you are OK with adding Guadalupe J. Ortiz to our manuscript co-authors.

Thank you.  
Andrey
